# Supplementary material for: Benzoindolium–triarylborane conjugates: a ratiometric fluorescent chemodosimeter for the detection of cyanide ions in aqueous medium
Source: Royal Society of Chemistry journal article supplement (doi:10.1039/c5dt03189c), 2015-12-01
Supplement: c5dt03189c1.pdf [file c5dt03189c1.pdf]

## Supplementary Information

### **Benzoindolium-Triarylborane Conjugates: Ratiometric Fluorescent Chemodosimeter for the Detection of Cyanide ions in Aqueous Medium**

C. Arivazhagan, Rosmita Borthakur, R. Jagan and Sundargopal Ghosh\*

Department of Chemistry, Indian Institute of Technology Madras, Chennai 600 036, India.

Fax: 91-44-2257 4202

Email: [sghosh@iitm.ac.in](mailto:sghosh@iitm.ac.in)

#### **Table of contents**

##### **I. Spectroscopic data of **3****

- Fig. S1  $^1\text{H}$  NMR of **3** in  $\text{CDCl}_3$   
Fig. S2  $^{13}\text{C}\{^1\text{H}\}$  NMR of **3** in  $\text{CDCl}_3$   
Fig. S3  $^1\text{H}$  NMR of **3** in  $d_6$ -DMSO  
Fig. S4  $^{13}\text{C}\{^1\text{H}\}$  NMR of **3** in  $d_6$ -DMSO  
Fig. S5  $^{11}\text{B}$  NMR of **3** in  $d_6$ -DMSO  
Fig. S6  $^1\text{H}$  NMR of **3**+NaCN in  $d_6$ -DMSO: $\text{D}_2\text{O}$   
Fig. S7  $^{13}\text{C}\{^1\text{H}\}$  NMR of **3**+NaCN in  $d_6$ -DMSO: $\text{D}_2\text{O}$   
Fig. S8  $^{11}\text{B}$  NMR of **3**+NaCN in  $d_6$ -DMSO: $\text{D}_2\text{O}$   
Fig. S9 ESI-MS spectrum of **3**  
Fig. S10 HRMS spectrum of **3**  
Fig. S11 ESI-MS spectrum of **3**+ $\text{CN}^-$   
Fig. S12 HRMS spectrum of **3**+ $\text{CN}^-$   
Fig. S13 Visual color changes of **3** (100  $\mu\text{M}$ ) upon addition of different anions in MeCN/water mixture (1:9, v/v) at 25° C.  
Fig. S14 Job's plot of **3** with  $\text{CN}^-$  anions in  $\text{CH}_3\text{CN}$ /water (1:9, v/v) indicating the formation of 1:1 complex.  
Fig. S15 Benesi-Hildebrand plot obtained from the emission spectrum (fluorescence calculated from 457 nm) for **3**- $\text{CN}^-$   
Fig. S16 Linear response in fluorescence ratio intensity of probe **3** in the presence of increasing  $\text{CN}^-$  concentrations.

##### **II. Single-Crystal X-ray Diffraction details**

- Fig. S17 Molecular structure of **3**. (50% probability for thermal ellipsoids). a) Front view b) side view. Except water molecule hydrogen atoms are not shown for clarity.  
Table S1. Crystallographic Data and Structure Refinements Summary for Compound **3**

### III. Computational details

- Fig. S18 Optimized geometry of **3** and **3-CN<sup>-</sup>**
- Table S2 HOMO-LUMO energy calculated for species **3** and **3-CN<sup>-</sup>**
- Fig. S19 Optimized structure of cyanide adducts at different binding sites (**3-CN<sup>-</sup>** and **3-B-CN<sup>-</sup>**) and energy comparison of the optimized structures of **3-CN<sup>-</sup>** and **3-B-CN<sup>-</sup>**.
- Table S3 Selected electronic excitation energies (eV), oscillator strengths (f), major contributions of low-lying excited states of the probe **3** and **3-CN<sup>-</sup>** at the CAM-B3LYP/6-31G(d) level in water.
- Fig. S20. Comparison between the experimental UV-visible absorption spectrum of **3** in MeCN/water mixture (1:9, v/v) and TD-DFT (CAM-B3LYP/6-31G(d)) calculated transitions of compound **3** from the optimized (B3LYP/6-31G(d)) ground state structure.
- Fig. S21 Comparison between the experimental UV-visible absorption spectrum of **3-CN<sup>-</sup>** in MeCN/water mixture (1:9, v/v) and TD-DFT (CAM-B3LYP/6-31G(d)) calculated transitions of compound **3-CN<sup>-</sup>** from the optimized (B3LYP/6-31G(d)) ground state structure.

### IV. References:

### III. Supplementary Data

Cartesian coordinates for the calculated structure of **3**, **3-CN<sup>-</sup>** and **3-B-CN<sup>-</sup>**

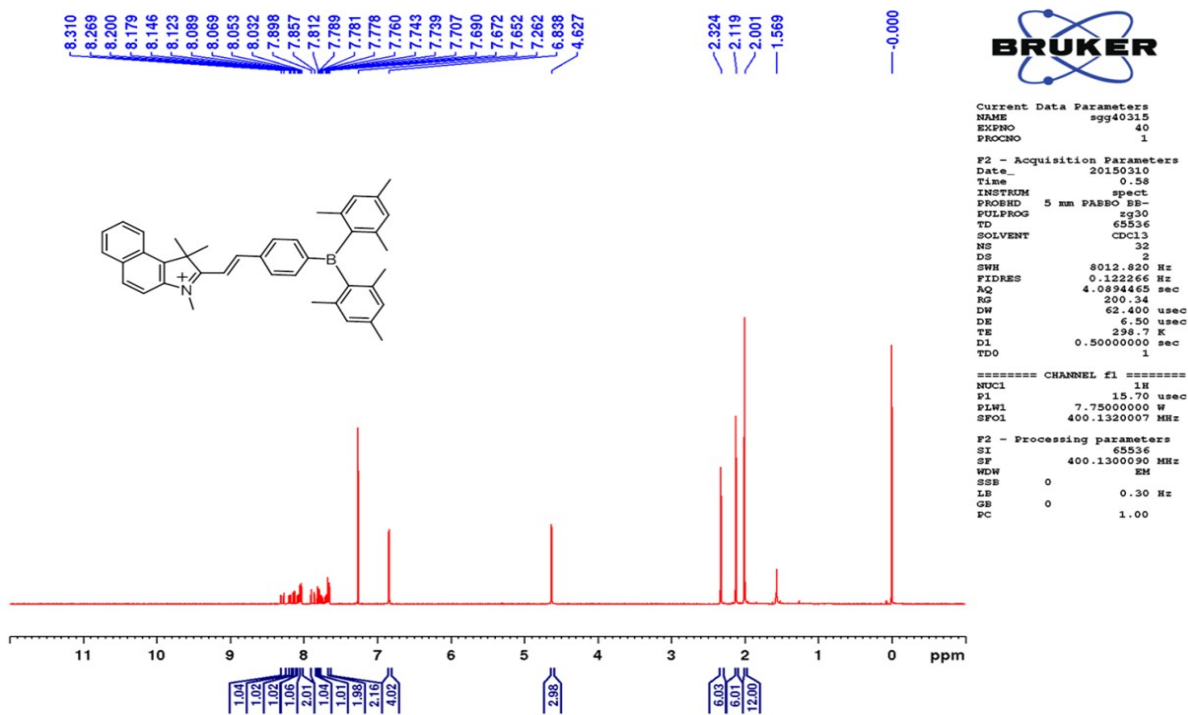

Fig. S1.  $^1\text{H}$  NMR of **3** in  $\text{CDCl}_3$

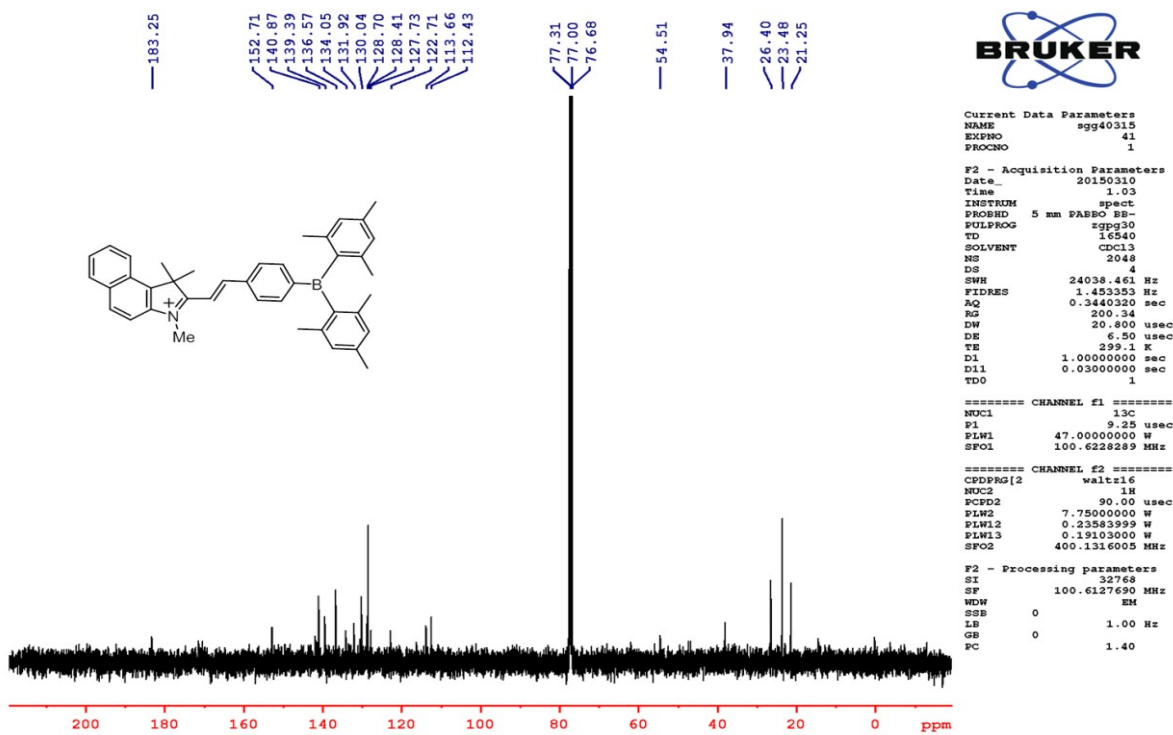

Fig. S2.  $^{13}\text{C}\{^1\text{H}\}$  NMR of **3** in  $\text{CDCl}_3$

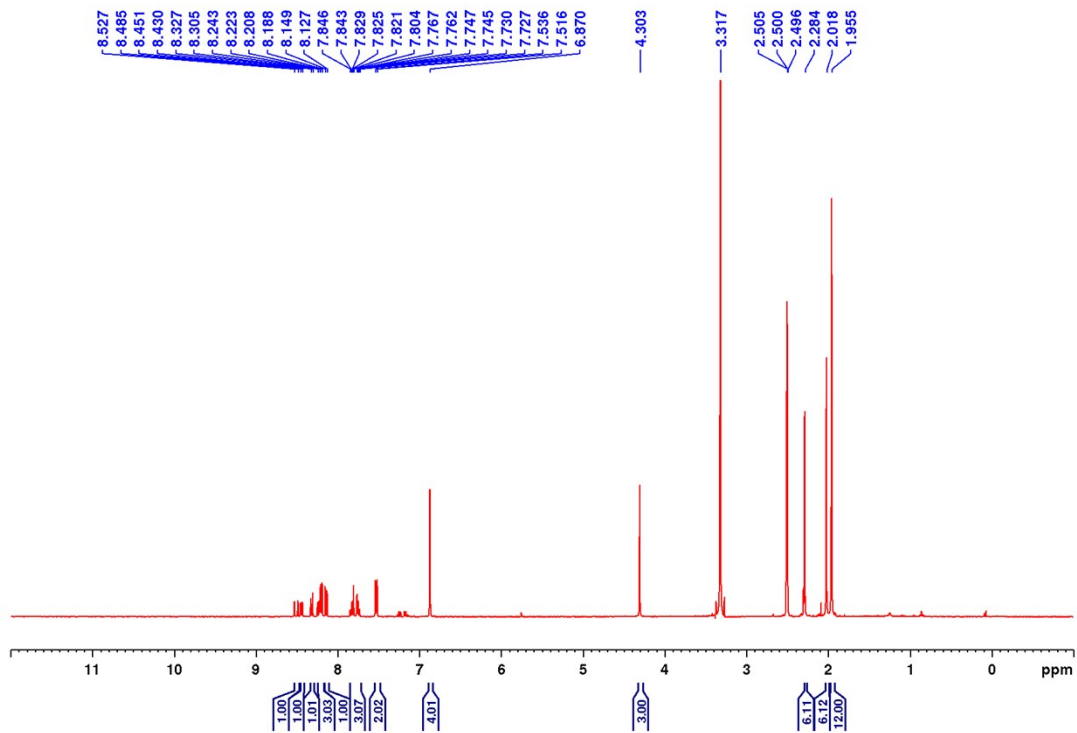

Fig. S3.  $^1\text{H}$  NMR of **3** in  $\text{d}_6\text{-DMSO}$

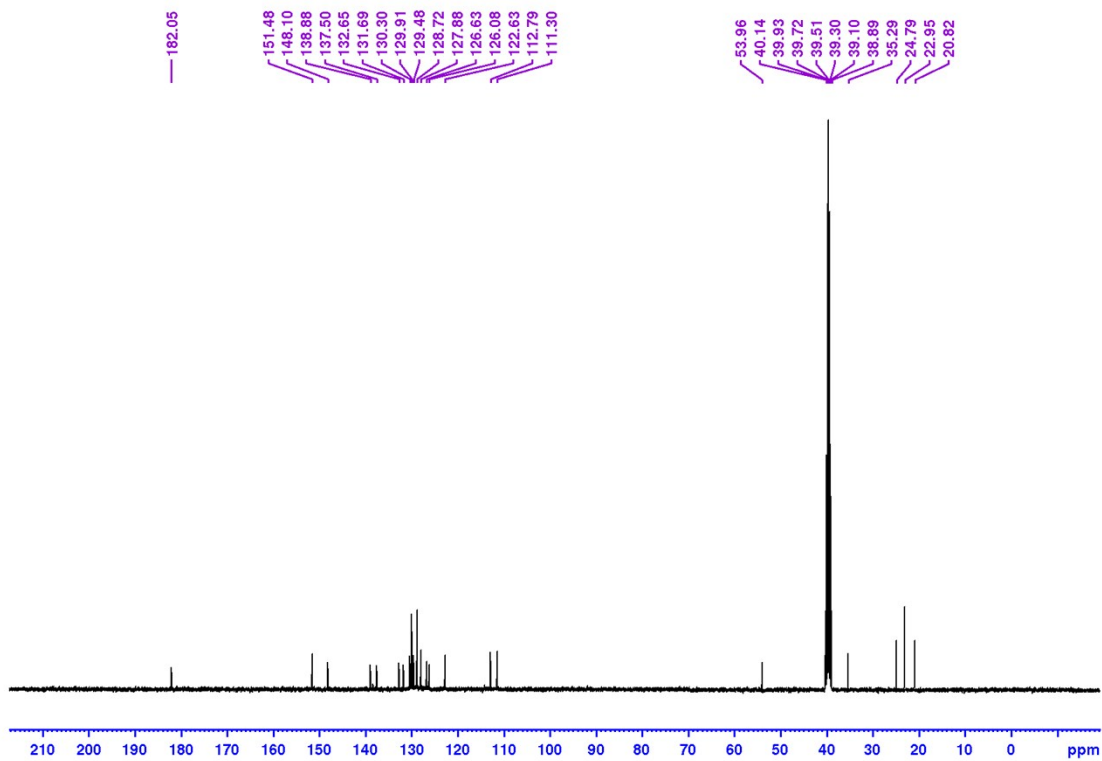

Fig. S4.  $^{13}\text{C}\{^1\text{H}\}$  NMR of **3** in  $\text{d}_6\text{-DMSO}$

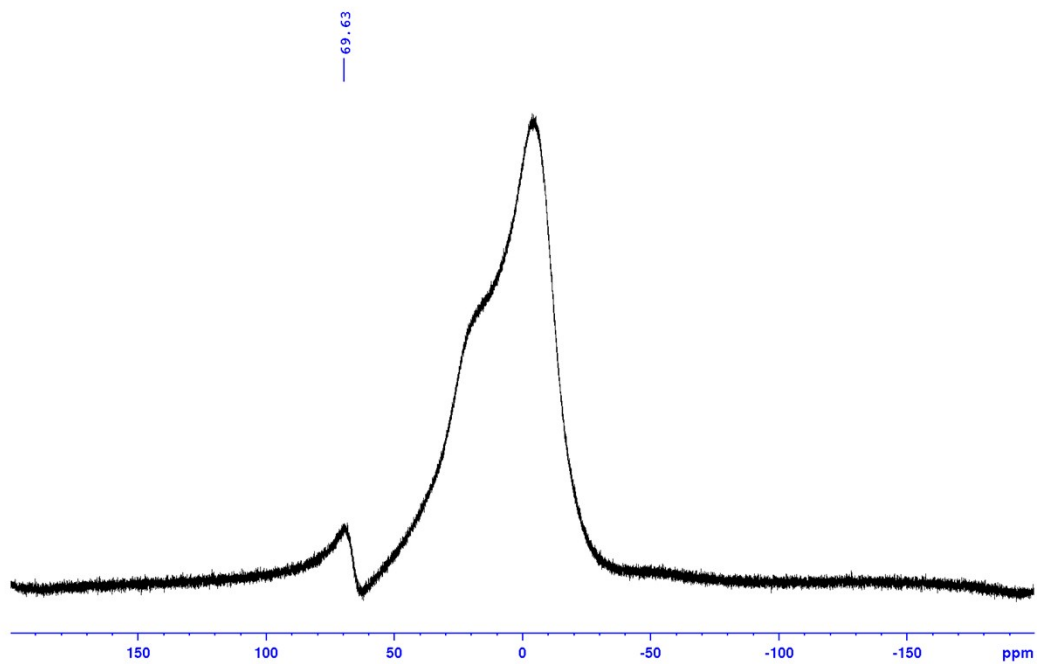

Fig. S5.  $^{11}\text{B}$  NMR of 3 in  $\text{d}_6\text{-DMSO}$

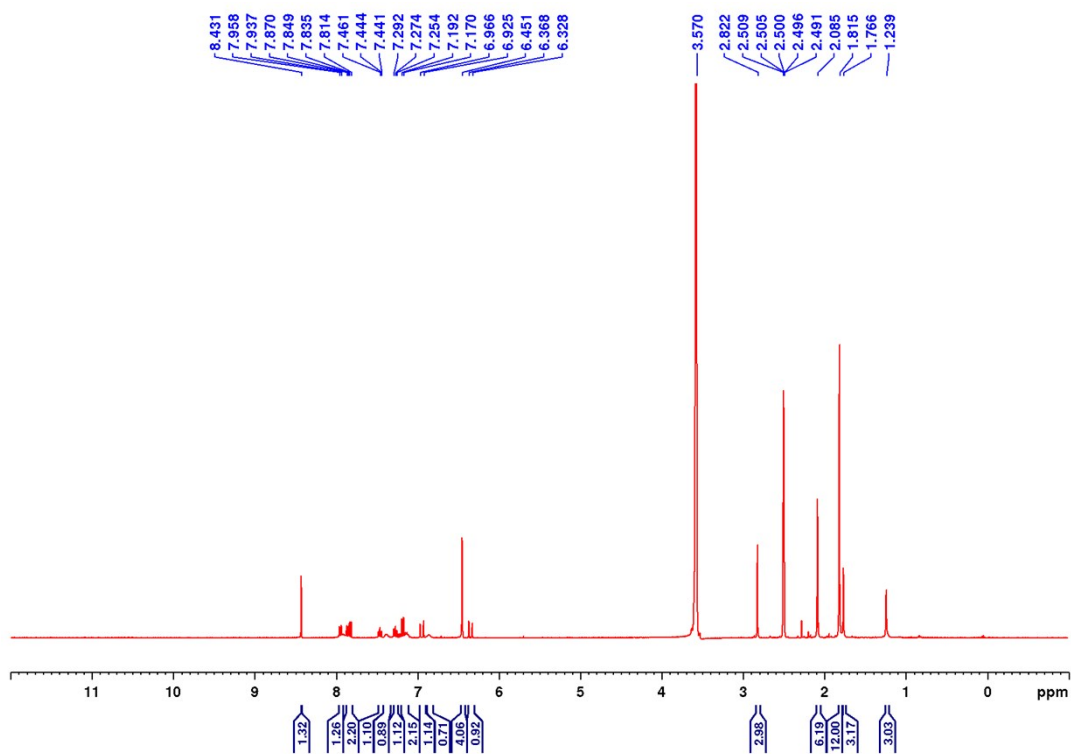

Fig. S6.  $^1\text{H}$  NMR of  $3+\text{NaCN}$  in  $\text{d}_6\text{-DMSO:D}_2\text{O}$

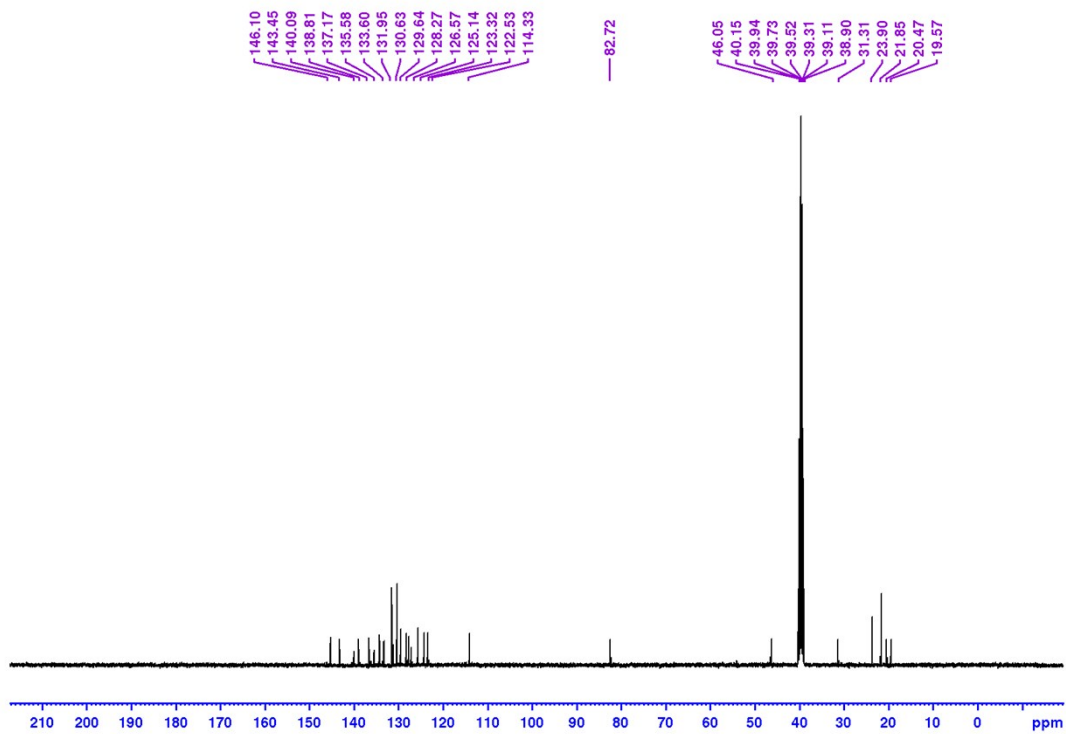

**Fig. S6.**  $^{13}\text{C}\{^1\text{H}\}$  NMR of **3**+NaCN in  $d_6$ -DMSO: $\text{D}_2\text{O}$

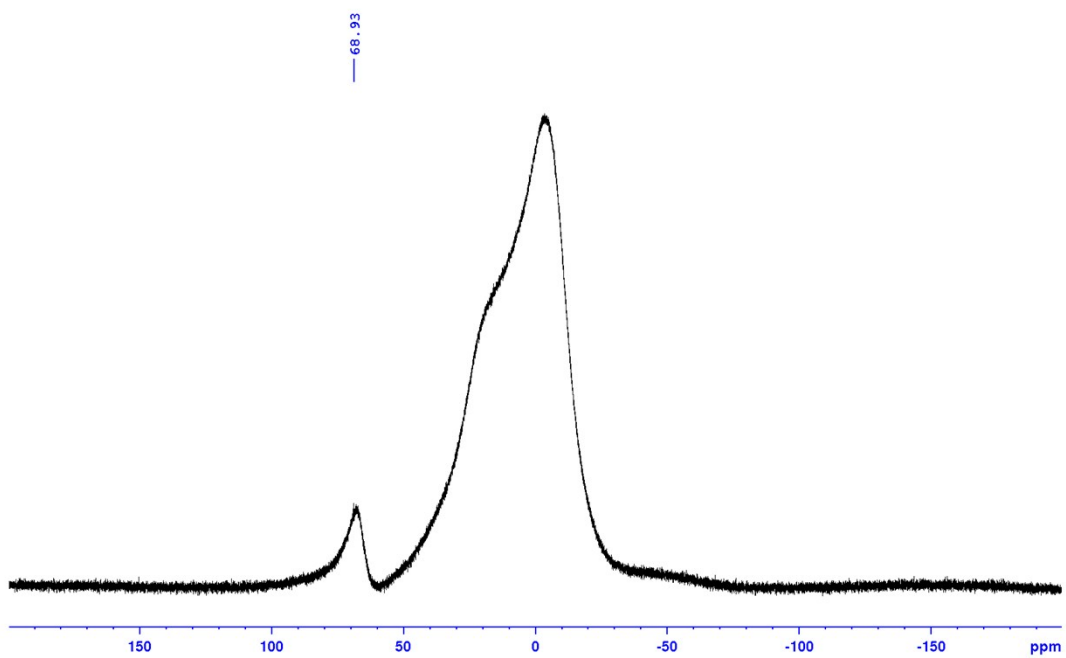

**Fig. S8.**  $^1\text{H}$  NMR of **3**+NaCN in  $d_6$ -DMSO: $\text{D}_2\text{O}$

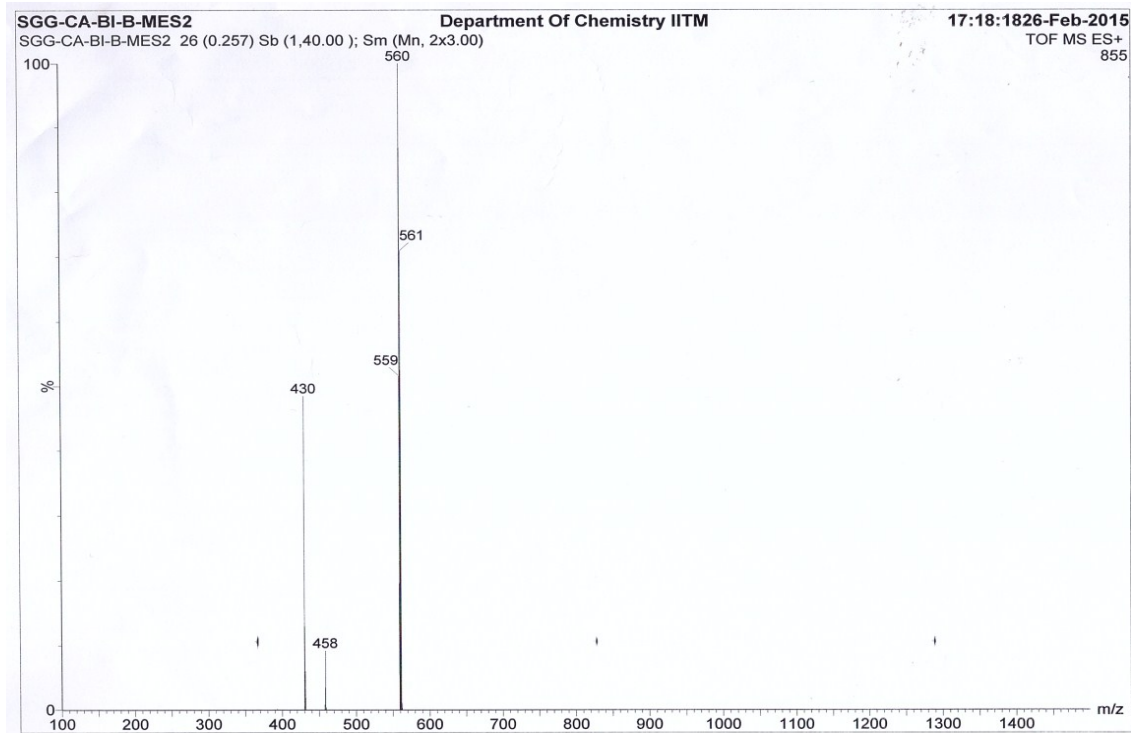

Fig. S9. ESI-MS spectrum of 3

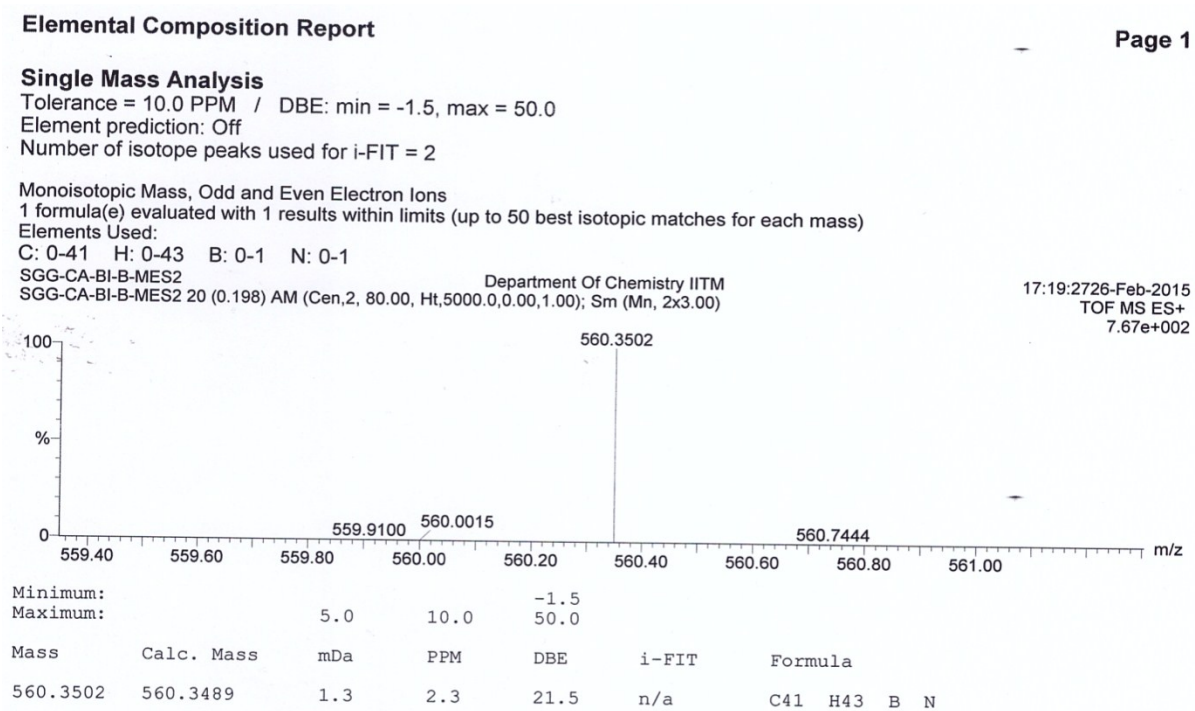

Fig. S10. HRMS spectrum of 3

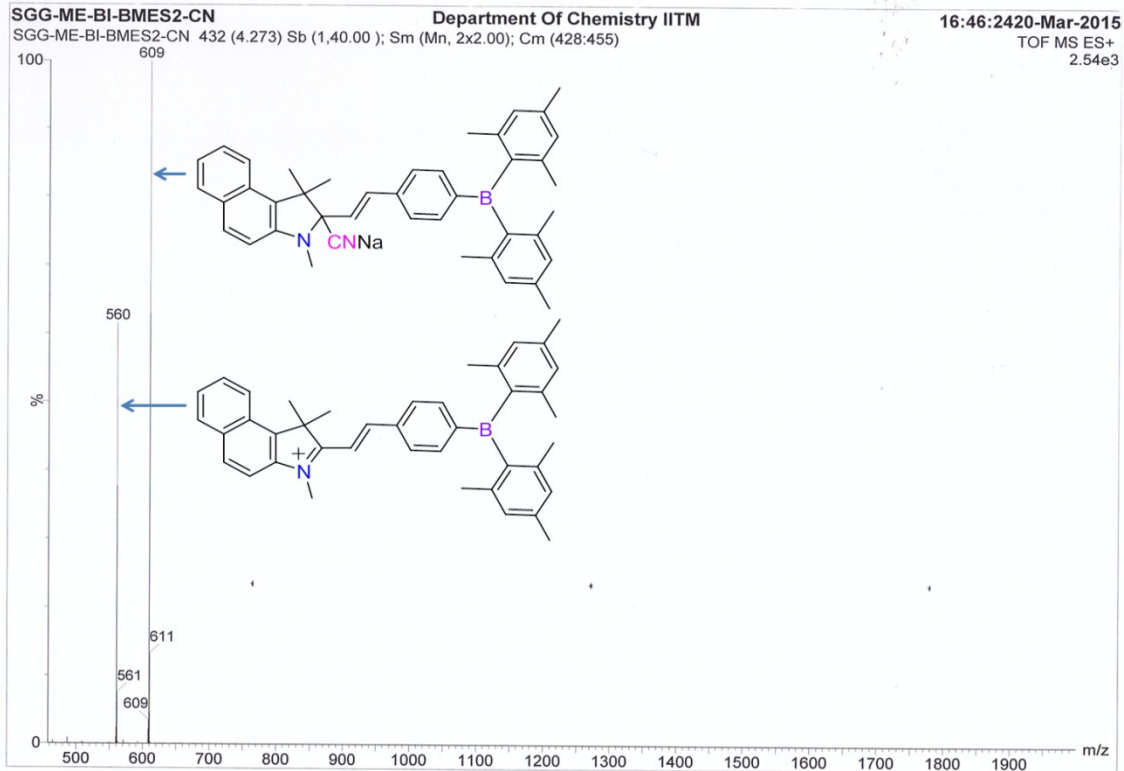

Fig. S11. ESI-MS spectrum of 3+CN<sup>-</sup>

Elemental Composition Report

Page 1

Single Mass Analysis

Tolerance = 10.0 PPM / DBE: min = -1.5, max = 50.0  
 Element prediction: Off  
 Number of isotope peaks used for i-FIT = 2

Monoisotopic Mass, Odd and Even Electron Ions  
 2 formula(e) evaluated with 1 results within limits (up to 50 best isotopic matches for each mass)

Elements Used:

C: 0-42 H: 0-43 B: 0-1 N: 0-2 Na: 0-1

SGG-ME-BI-BMES2-CN Department Of Chemistry IITM  
 SGG-ME-BI-BMES2\_CN 6 (0.059) AM (Cen,4, 80.00, Ht,5000.0,0.00,1.00); Sm (Mn, 2x2.00)

16:51:4920-Mar-2015  
 TOF MS ES+  
 7.78e+001

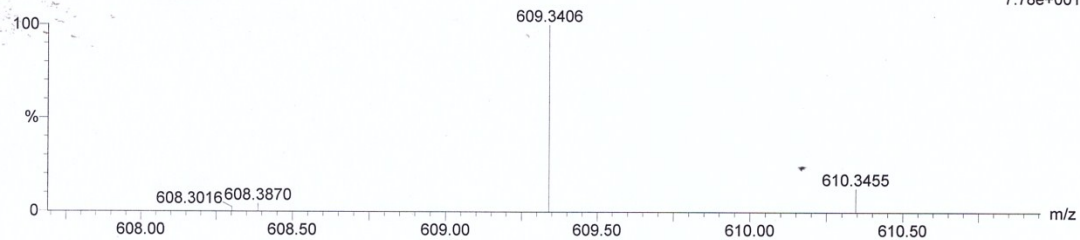

| Mass     | Calc. Mass | mDa  | PPM  | DBE  | i-FIT | Formula         |
|----------|------------|------|------|------|-------|-----------------|
| 609.3406 | 609.3417   | -1.1 | -1.8 | 22.5 | 12.9  | C42 H43 B N2 Na |

Fig. S12. HRMS spectrum of 3+CN<sup>-</sup>



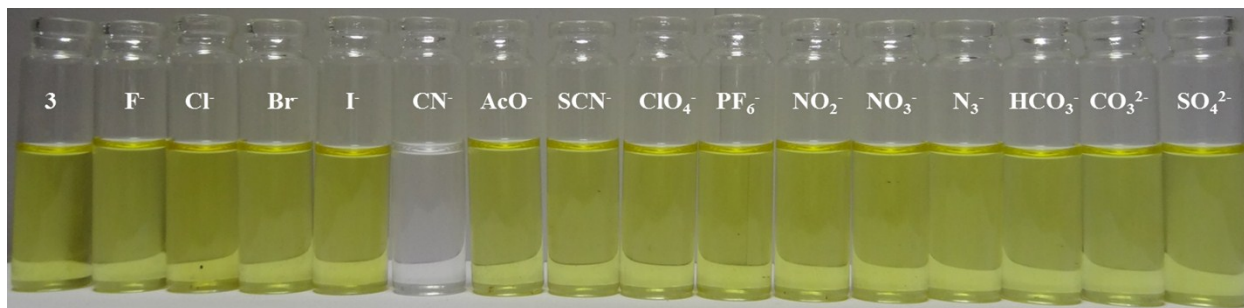

**Fig. S13.** Photographs of **3** in MeCN/water mixture (1:9) under day light in the presence of different anions.

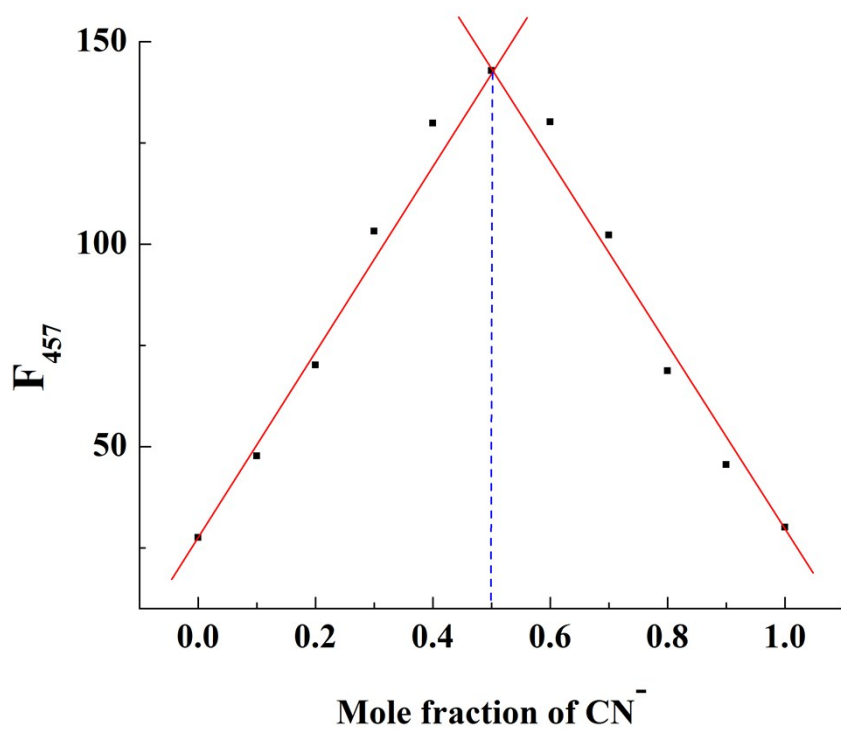

**Fig. S14.** Job's plot of **3** with  $\text{CN}^-$  anions in  $\text{CH}_3\text{CN}/\text{water}$  (1:9, v/v) indicating the formation of 1:1 complex.

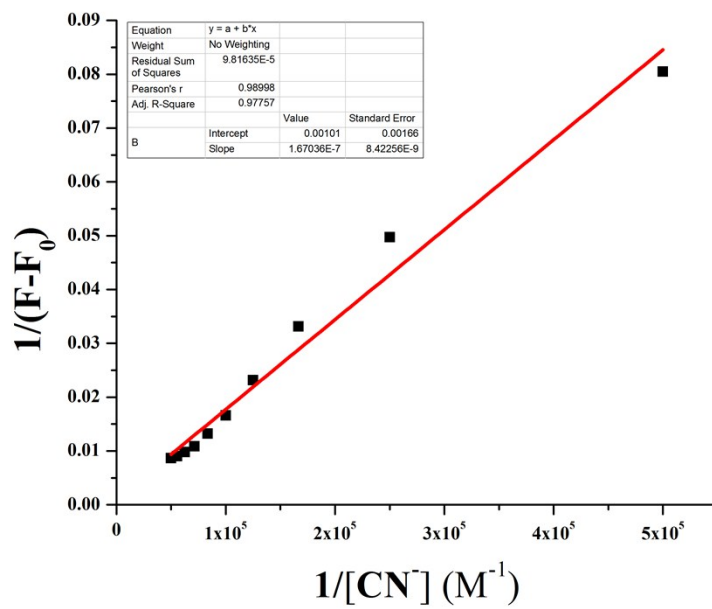

**Fig. S15.** Benesi-Hildebrand plot obtained from the emission spectrum (fluorescence calculated from 457 nm) for **3-CN<sup>-</sup>**

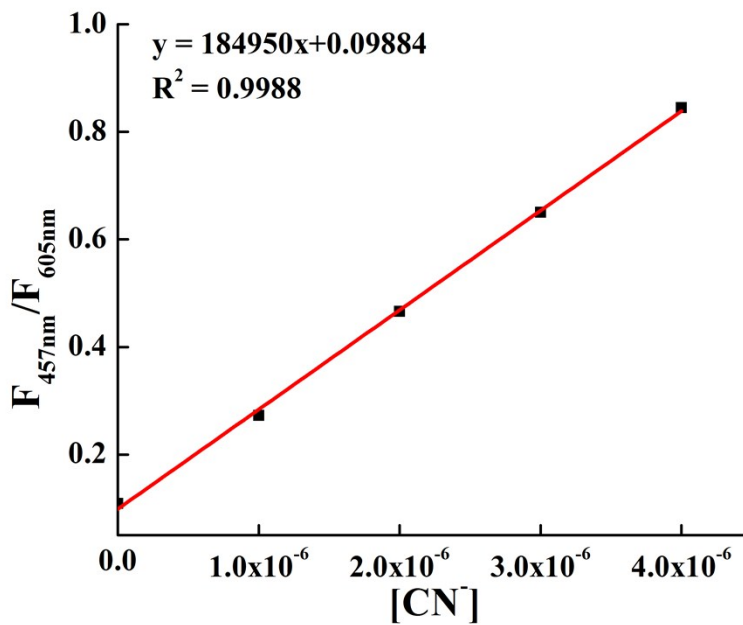

**Fig. S16.** Linear response in fluorescence ratio intensity of probe **3** in the presence of increasing **CN<sup>-</sup>** concentrations.

### Single-Crystal X-ray Diffraction:

X-ray diffraction data for the crystal **3** was collected using Bruker Kappa apexII CCD single crystal diffractometer, equipped with graphite monochromated MoK $\alpha$  ( $\lambda=0.71078\text{\AA}$ ) radiation. Data collection was carried out at 296K using  $\omega$ - $\phi$  scan modes. The collected frames were integrated followed by Lorentz and Polarization correction using the program SAINT-APEXII<sup>1</sup>. Multi-scan absorption correction has been employed for the data using SADABS<sup>1</sup> program. The molecular structure was solved by direct methods procedure using SHELXS-2012<sup>2</sup>. Initially isotropic refinements of non-hydrogen atoms were carried out followed by full-matrix least squares refinement with anisotropic thermal parameters for non-hydrogen atoms through SHELX-2012<sup>2</sup> program. The hydrogen atoms associated with the carbon atoms were identified from the difference electron density map and were allowed to ride on the parent atom using suitable constraint, with distance 0.93 $\text{\AA}$ (for aromatic CH) and 0.96 $\text{\AA}$ (CH<sub>3</sub>) and thermal displacement of  $U_{eq}(H) = 1.2U_{iso}(C)$  and  $U_{eq}(H) = 1.5U_{iso}(C)$  respectively. The structural parameters for **3** have been listed in Table S1.

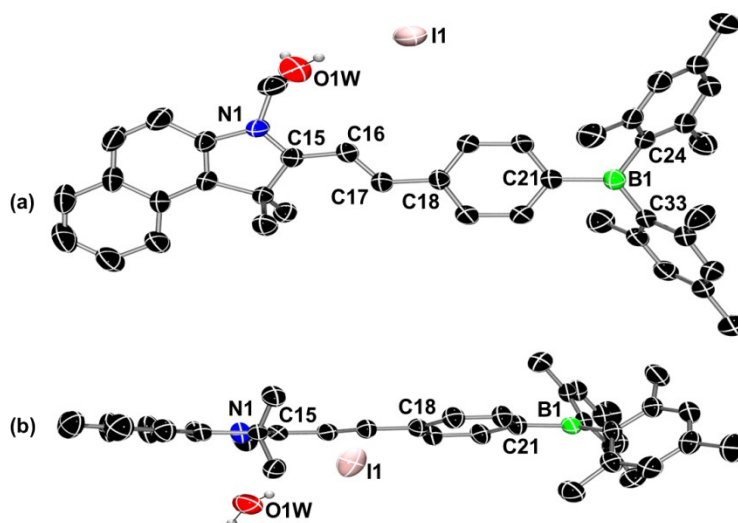

**Fig. S17.** Molecular structure of **3**. (50% probability for thermal ellipsoids). a) Front view b) side view. Except water molecule hydrogen atoms are not shown for clarity.

**Table S1.** Crystallographic Data and Structure Refinements Summary for Compound **3**:

| Data                                  | <b>3</b>                                                                           |
|---------------------------------------|------------------------------------------------------------------------------------|
| Molecular structure                   | 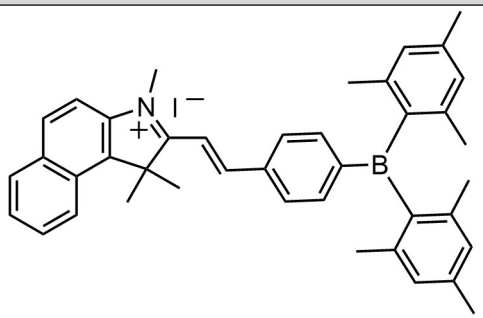 |
| ORTEP structure                       |  |
| Formula                               | C <sub>41</sub> H <sub>44</sub> BINO <sub>0.50</sub>                               |
| Formula weight                        | 696.48                                                                             |
| Color                                 | red                                                                                |
| Crystal morphology                    | block                                                                              |
| Temperature/K                         | 296(2)                                                                             |
| Radiation                             | Mo K $\alpha$                                                                      |
| Wavelength/Å                          | 0.71073                                                                            |
| Crystal system                        | Monoclinic                                                                         |
| Space group                           | P2 <sub>1</sub> /c                                                                 |
| a (Å)                                 | 23.094(3)                                                                          |
| b (Å)                                 | 9.7806(12)                                                                         |
| c (Å)                                 | 15.9792(18)                                                                        |
| $\alpha$ (°)                          | 90                                                                                 |
| $\beta$ (°)                           | 94.232(3)                                                                          |
| $\gamma$ (°)                          | 90                                                                                 |
| Volume (Å <sup>3</sup> )              | 3599.4(3)                                                                          |
| Z                                     | 4                                                                                  |
| Density (g/ml)                        | 1.285                                                                              |
| $\mu$ (1/mm)                          | 0.919                                                                              |
| F (000)                               | 1436                                                                               |
| $\theta$ (min, max)                   | 1.768, 26.370                                                                      |
| No. of unique reflns                  | 7315                                                                               |
| No. of parameters                     | 432                                                                                |
| R <sub>obs</sub> , wR2 <sub>obs</sub> | 0.0473, 0.1096                                                                     |

## Computational details:

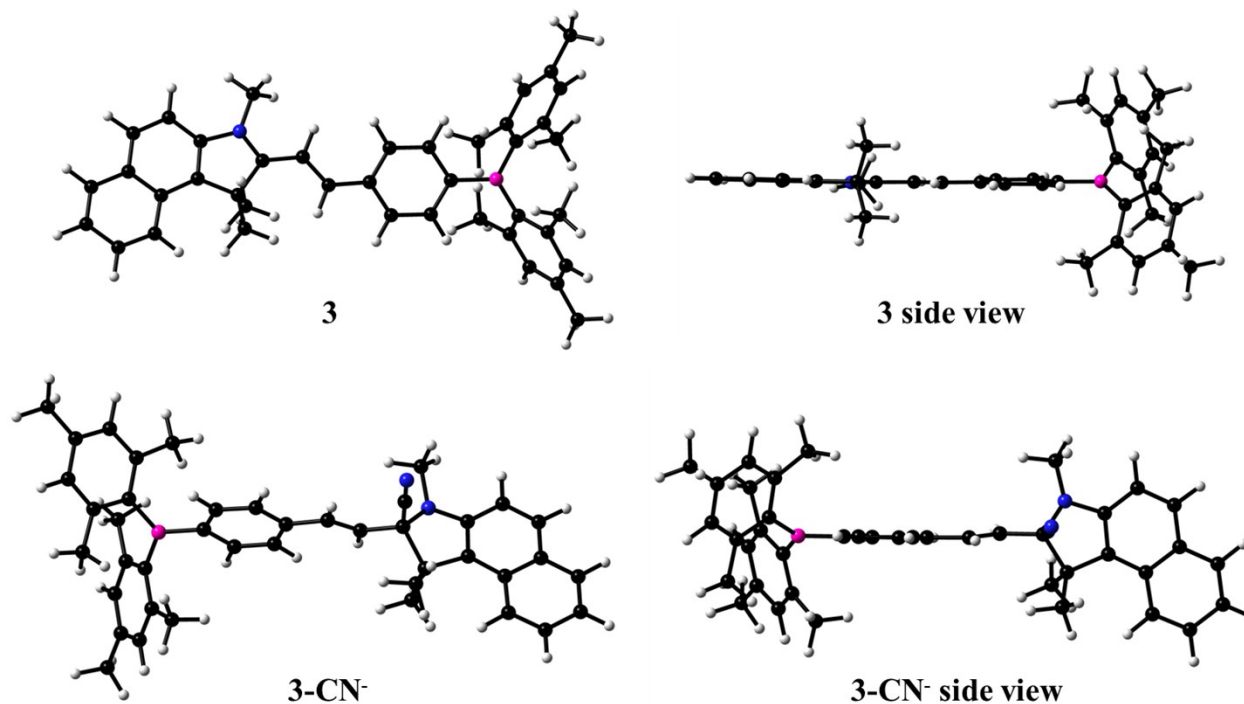Fig. S18. Optimized geometries of **3** and **3-CN<sup>-</sup>**Table S2. HOMO-LUMO energy calculated for species **3** and **3-CN<sup>-</sup>**

| Species                 | E(HOMO)  | E(LUMO)  | $\Delta E$<br>(Hartree) | $\Delta E$<br>(eV) |
|-------------------------|----------|----------|-------------------------|--------------------|
| <b>3</b>                | -0.2871  | -0.21657 | 0.07053                 | 1.919234148        |
| <b>3-CN<sup>-</sup></b> | -0.19224 | -0.07375 | 0.11849                 | 3.224302484        |



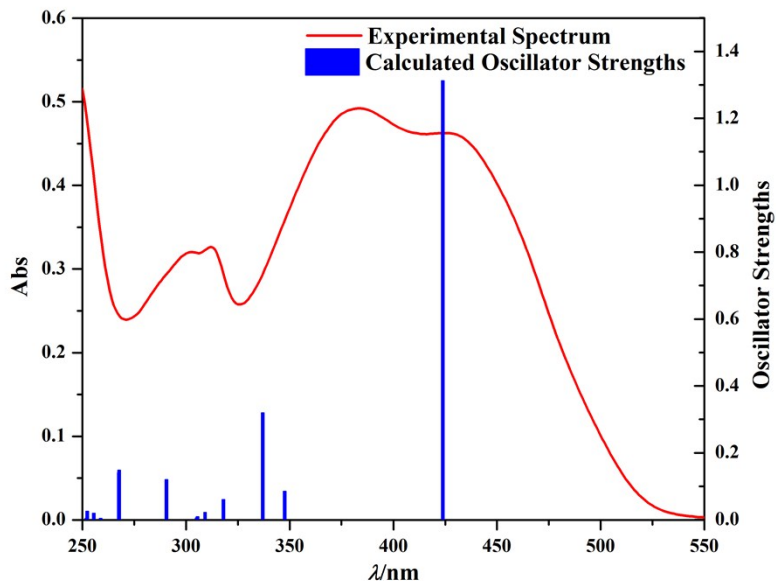

**Fig. S20.** Comparison between the experimental UV-visible absorption spectrum of **3** in MeCN/water mixture (1:9, v/v) and TD-DFT (CAM-B3LYP/6-31G(d)) calculated transitions of compound **3** from the optimized (B3LYP/6-31G(d)) ground state structure.

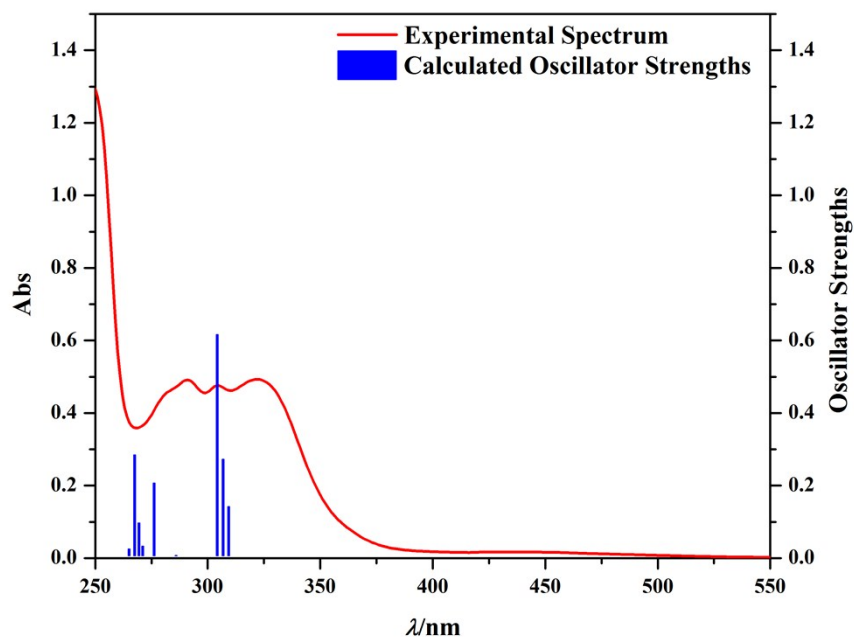

**Fig. S21.** Comparison between the experimental UV-visible absorption spectrum of **3-CN<sup>-</sup>** in MeCN/water mixture (1:9, v/v) and TD-DFT (CAM-B3LYP/6-31G(d)) calculated transitions of compound **3-CN<sup>-</sup>** from the optimized (B3LYP/6-31G(d)) ground state structure.

**References:**

1. Bruker (2004). APEX2, SAINT and SADABS. Bruker AXS Inc., Madison, Wisconsin, USA.
2. Sheldrick, G. M, Acta Cryst. 2015, **C71**, 3.



### Cartesian coordinates for the calculated structure of 3

Energy = -1667.72421690 a. u.

|   |              |              |              |   |              |              |              |
|---|--------------|--------------|--------------|---|--------------|--------------|--------------|
| C | 10.240072000 | 1.340823000  | 0.911183000  | H | 10.909662000 | -0.385950000 | -0.165309000 |
| C | 10.055074000 | 0.189581000  | 0.180029000  | H | 7.003813000  | 2.256379000  | 1.421336000  |
| C | 8.751697000  | -0.271539000 | -0.139014000 | H | 9.273332000  | 2.989720000  | 1.932088000  |
| C | 7.608025000  | 0.481163000  | 0.312620000  | H | 9.452605000  | -2.010665000 | -1.215704000 |
| C | 7.840095000  | 1.666242000  | 1.065967000  | H | 7.213353000  | -2.852539000 | -1.790517000 |
| C | 9.120808000  | 2.082104000  | 1.355669000  | H | 5.353950000  | 1.183348000  | 2.301221000  |
| C | 8.571029000  | -1.464071000 | -0.893652000 | H | 3.640583000  | 0.840293000  | 2.030670000  |
| C | 7.322210000  | -1.937467000 | -1.219959000 | H | 4.794261000  | -0.489968000 | 2.230322000  |
| C | 6.216545000  | -1.186725000 | -0.772784000 | H | 4.849960000  | 1.834988000  | -1.464400000 |
| C | 6.324997000  | -0.024077000 | -0.032044000 | H | 5.397275000  | 2.612286000  | 0.023968000  |
| N | 4.840888000  | -1.472559000 | -0.986698000 | H | 3.680869000  | 2.253989000  | -0.200395000 |
| C | 4.049657000  | -0.562389000 | -0.406718000 | H | 2.241380000  | -1.540668000 | -0.973722000 |
| C | 4.924778000  | 0.495733000  | 0.273700000  | H | 2.122208000  | 1.101022000  | 0.580774000  |
| C | 4.656093000  | 0.507620000  | 1.802601000  | H | 3.658675000  | -2.310340000 | -2.514308000 |
| C | 4.692538000  | 1.884048000  | -0.382723000 | H | 5.210746000  | -3.110858000 | -2.235215000 |
| C | 2.635859000  | -0.669715000 | -0.462036000 | H | 3.884078000  | -3.352763000 | -1.079059000 |
| C | 1.739348000  | 0.220602000  | 0.074653000  | C | 0.301788000  | 0.131003000  | 0.042896000  |
| C | 4.365711000  | -2.632086000 | -1.746415000 | C | -0.444574000 | 1.186318000  | 0.617897000  |
| H | 11.242620000 | 1.682945000  | 1.148690000  | C | -0.407633000 | -0.952418000 | -0.529209000 |

|   |              |              |              |   |              |              |              |
|---|--------------|--------------|--------------|---|--------------|--------------|--------------|
| C | -1.831908000 | 1.168650000  | 0.602100000  | C | -6.243578000 | 3.938091000  | -0.297670000 |
| H | 0.082367000  | 2.026420000  | 1.064792000  | H | -7.315523000 | 3.294354000  | 1.448759000  |
| C | -1.792016000 | -0.971440000 | -0.510740000 | H | -5.033175000 | 4.244912000  | -2.043593000 |
| H | 0.128018000  | -1.786112000 | -0.973938000 | C | -3.521685000 | -1.886868000 | 2.327811000  |
| C | -2.546946000 | 0.088823000  | 0.044402000  | H | -2.491589000 | -2.117627000 | 2.028493000  |
| H | -2.381830000 | 2.003038000  | 1.027839000  | H | -3.545700000 | -0.827581000 | 2.602327000  |
| H | -2.317891000 | -1.823569000 | -0.932101000 | H | -3.730517000 | -2.462764000 | 3.235078000  |
| B | -4.138879000 | 0.059479000  | 0.042076000  | C | -6.251971000 | -0.875014000 | -1.927105000 |
| C | -4.846028000 | -1.338503000 | 0.183819000  | H | -5.403738000 | -0.536197000 | -2.533320000 |
| C | -5.822198000 | -1.753042000 | -0.767371000 | H | -6.928068000 | -1.421914000 | -2.591138000 |
| C | -4.519245000 | -2.235210000 | 1.236888000  | H | -6.774974000 | 0.023114000  | -1.583387000 |
| C | -6.402578000 | -3.019394000 | -0.663363000 | C | -6.773674000 | -5.239425000 | 0.492956000  |
| C | -5.151270000 | -3.479272000 | 1.322398000  | H | -6.219653000 | -5.918180000 | 1.148982000  |
| C | -6.090833000 | -3.898176000 | 0.378507000  | H | -7.784284000 | -5.132846000 | 0.908639000  |
| H | -7.129650000 | -3.326084000 | -1.412787000 | H | -6.878945000 | -5.720352000 | -0.485784000 |
| H | -4.906575000 | -4.139172000 | 2.152737000  | C | -6.354255000 | 0.877679000  | 1.959076000  |
| C | -4.901264000 | 1.426735000  | -0.102215000 | H | -6.825970000 | -0.037673000 | 1.588037000  |
| C | -5.922244000 | 1.787958000  | 0.825424000  | H | -5.514147000 | 0.568641000  | 2.591665000  |
| C | -4.586658000 | 2.349774000  | -1.136446000 | H | -7.075812000 | 1.387706000  | 2.604308000  |
| C | -6.551159000 | 3.030262000  | 0.720587000  | C | -3.555159000 | 2.060145000  | -2.213271000 |
| C | -5.267461000 | 3.567973000  | -1.224013000 | H | -2.554037000 | 2.400317000  | -1.919614000 |

|   |              |             |              |   |              |             |              |
|---|--------------|-------------|--------------|---|--------------|-------------|--------------|
| H | -3.475318000 | 0.995954000 | -2.453301000 | H | -6.533611000 | 5.979322000 | 0.352370000  |
| H | -3.813926000 | 2.584316000 | -3.139046000 | H | -6.824924000 | 5.725630000 | -1.372711000 |
| C | -6.941713000 | 5.273320000 | -0.383014000 | H | -8.013353000 | 5.178753000 | -0.175788000 |

### Cartesian coordinates for the calculated structure of 3-CN<sup>-</sup>

Energy = -1760.75047660 a. u.

|   |             |              |              |   |             |              |              |
|---|-------------|--------------|--------------|---|-------------|--------------|--------------|
| C | 7.285247800 | -2.965652860 | 4.833863900  | C | 1.582225250 | 0.212500020  | 0.064289880  |
| C | 7.195660710 | -3.752142260 | 3.707996610  | C | 4.187602440 | -2.418737930 | -2.055288980 |
| C | 6.501297200 | -3.301531400 | 2.555598730  | H | 7.819422220 | -3.322103360 | 5.709169710  |
| C | 5.882078320 | -1.999661220 | 2.570472650  | H | 7.658181690 | -4.735191710 | 3.685568040  |
| C | 5.996731060 | -1.215987120 | 3.753058840  | H | 5.543601070 | -0.232898440 | 3.799170170  |
| C | 6.679519490 | -1.687930920 | 4.852223630  | H | 6.753830480 | -1.072036330 | 5.743537810  |
| C | 6.412593140 | -4.123054450 | 1.397374460  | H | 6.886187500 | -5.100241450 | 1.419115470  |
| C | 5.748032300 | -3.716040170 | 0.264754840  | H | 5.690335050 | -4.364957790 | -0.601455290 |
| C | 5.152047710 | -2.439382990 | 0.296738090  | H | 3.538789040 | -0.043442620 | 3.029445370  |
| C | 5.197691910 | -1.596278750 | 1.391863560  | H | 2.636143220 | 0.754972050  | 1.735507350  |
| N | 4.420395260 | -1.806466800 | -0.744412360 | H | 2.544847080 | -1.004022580 | 1.930522990  |
| C | 4.438229930 | -0.317026350 | 1.058658110  | H | 6.219010930 | 0.774779940  | 0.382661550  |
| C | 3.210925500 | -0.138143460 | 1.992251140  | H | 5.806541280 | 1.044152340  | 2.078625140  |
| C | 5.386581850 | 0.912790690  | 1.079245030  | H | 4.862753660 | 1.832602960  | 0.808831610  |
| C | 2.478736250 | -0.677816980 | -0.472399120 | H | 2.084257250 | -1.548769980 | -0.984085120 |

|   |              |              |              |   |              |              |              |
|---|--------------|--------------|--------------|---|--------------|--------------|--------------|
| H | 1.965085250  | 1.092920020  | 0.570410880  | H | -7.286772750 | -3.334185980 | -1.423150120 |
| H | 4.484413730  | -1.727760150 | -2.847458670 | H | -5.063697750 | -4.147273980 | 2.142373880  |
| H | 4.789186080  | -3.320348900 | -2.141469120 | C | -5.058386750 | 1.418633020  | -0.112578120 |
| H | 3.131958100  | -2.681581140 | -2.170346290 | C | -6.079366750 | 1.779856020  | 0.815060880  |
| C | 0.144665250  | 0.122901020  | 0.032532880  | C | -4.743780750 | 2.341672020  | -1.146809120 |
| C | -0.601696750 | 1.178216020  | 0.607533880  | C | -6.708281750 | 3.022160020  | 0.710223880  |
| C | -0.564755750 | -0.960519980 | -0.539572120 | C | -5.424583750 | 3.559871020  | -1.234376120 |
| C | -1.989030750 | 1.160548020  | 0.591736880  | C | -6.400700750 | 3.929989020  | -0.308033120 |
| H | -0.074755750 | 2.018318020  | 1.054428880  | H | -7.472645750 | 3.286252020  | 1.438395880  |
| C | -1.949138750 | -0.979541980 | -0.521103120 | H | -5.190297750 | 4.236810020  | -2.053956120 |
| H | -0.029104750 | -1.794213980 | -0.984301120 | C | -3.678807750 | -1.894969980 | 2.317447880  |
| C | -2.704068750 | 0.080721020  | 0.034038880  | H | -2.648711750 | -2.125728980 | 2.018129880  |
| H | -2.538952750 | 1.994936020  | 1.017475880  | H | -3.702822750 | -0.835682980 | 2.591963880  |
| H | -2.475013750 | -1.831670980 | -0.942464120 | H | -3.887639750 | -2.470865980 | 3.224714880  |
| B | -4.296001750 | 0.051377020  | 0.031712880  | C | -6.409093750 | -0.883115980 | -1.937468120 |
| C | -5.003150750 | -1.346604980 | 0.173455880  | H | -5.560860750 | -0.544298980 | -2.543683120 |
| C | -5.979320750 | -1.761143980 | -0.777734120 | H | -7.085190750 | -1.430015980 | -2.601501120 |
| C | -4.676367750 | -2.243311980 | 1.226524880  | H | -6.932096750 | 0.015012020  | -1.593750120 |
| C | -6.559700750 | -3.027495980 | -0.673726120 | C | -6.930796750 | -5.247526980 | 0.482592880  |
| C | -5.308392750 | -3.487373980 | 1.312034880  | H | -6.376775750 | -5.926281980 | 1.138618880  |
| C | -6.247955750 | -3.906277980 | 0.368143880  | H | -7.941406750 | -5.140947980 | 0.898275880  |

|   |              |              |              |   |              |              |              |
|---|--------------|--------------|--------------|---|--------------|--------------|--------------|
| H | -7.036067750 | -5.728453980 | -0.496147120 | H | -3.971048750 | 2.576214020  | -3.149409120 |
| C | -6.511377750 | 0.869577020  | 1.948712880  | C | -7.098835750 | 5.265218020  | -0.393377120 |
| H | -6.983092750 | -0.045774980 | 1.577673880  | H | -6.690733750 | 5.971220020  | 0.342006880  |
| H | -5.671269750 | 0.560539020  | 2.581301880  | H | -6.982046750 | 5.717528020  | -1.383074120 |
| H | -7.232934750 | 1.379604020  | 2.593944880  | H | -8.170475750 | 5.170651020  | -0.186151120 |
| C | -3.712281750 | 2.052043020  | -2.223634120 | C | 3.973506940  | -0.600739650 | -0.373810700 |
| H | -2.711159750 | 2.392215020  | -1.929977120 | C | 4.540632790  | 0.421147920  | -1.376663670 |
| H | -3.632440750 | 0.987852020  | -2.463664120 | N | 4.962883760  | 1.181989660  | -2.123333290 |

**Cartesian coordinates for the calculated structure of 3-B-CN<sup>-</sup>**

Energy = -1760.71823159 a. u.

|   |               |              |              |   |               |              |              |
|---|---------------|--------------|--------------|---|---------------|--------------|--------------|
| C | -10.455460000 | -0.655356000 | 1.092885000  | C | -4.096522000  | 0.091672000  | -0.592030000 |
| C | -10.169472000 | -0.123218000 | -0.142860000 | C | -5.071595000  | -0.384699000 | 0.497215000  |
| C | -8.827861000  | 0.063569000  | -0.568492000 | C | -4.890550000  | 0.460991000  | 1.784592000  |
| C | -7.749063000  | -0.311488000 | 0.310804000  | C | -4.884349000  | -1.902317000 | 0.758207000  |
| C | -8.086399000  | -0.858662000 | 1.582045000  | C | -2.701370000  | 0.112914000  | -0.594794000 |
| C | -9.400162000  | -1.024824000 | 1.959522000  | C | -1.866950000  | -0.331946000 | 0.430581000  |
| C | -8.542141000  | 0.614694000  | -1.846785000 | C | -4.227673000  | 1.066043000  | -2.874907000 |
| C | -7.252024000  | 0.806676000  | -2.283454000 | H | -11.486097000 | -0.792805000 | 1.406177000  |
| C | -6.207812000  | 0.434178000  | -1.412503000 | H | -10.972031000 | 0.164637000  | -0.817397000 |
| C | -6.423187000  | -0.105842000 | -0.157800000 | H | -7.301582000  | -1.150611000 | 2.269622000  |
| N | -4.817903000  | 0.540023000  | -1.650663000 | H | -9.628884000  | -1.444366000 | 2.935152000  |

|   |              |              |              |   |              |              |              |
|---|--------------|--------------|--------------|---|--------------|--------------|--------------|
| H | -9.373657000 | 0.889497000  | -2.489994000 | C | 0.359493000  | 0.201062000  | -0.600302000 |
| H | -7.062450000 | 1.230923000  | -3.263071000 | H | -0.102339000 | 0.605564000  | -1.497057000 |
| H | -5.642044000 | 0.189072000  | 2.529552000  | C | 1.729936000  | 0.198610000  | -0.492997000 |
| H | -3.903427000 | 0.311121000  | 2.228559000  | H | 2.313035000  | 0.625907000  | -1.300660000 |
| H | -5.005866000 | 1.527121000  | 1.566437000  | C | 4.374941000  | -0.523402000 | 2.342998000  |
| H | -4.986870000 | -2.470135000 | -0.171650000 | C | 4.326501000  | 1.397406000  | 0.366340000  |
| H | -5.641768000 | -2.265507000 | 1.456839000  | C | 4.077253000  | 2.465456000  | 1.278957000  |
| H | -3.900867000 | -2.120078000 | 1.181649000  | C | 4.300510000  | 3.797411000  | 0.905085000  |
| H | -2.224477000 | 0.518386000  | -1.480431000 | H | 4.112160000  | 4.582384000  | 1.636563000  |
| H | -2.328300000 | -0.748831000 | 1.320693000  | C | 4.738718000  | 4.154239000  | -0.368373000 |
| H | -5.016715000 | 1.320713000  | -3.579504000 | C | 4.917858000  | 3.120995000  | -1.285642000 |
| H | -3.642318000 | 1.966708000  | -2.662618000 | H | 5.225766000  | 3.366199000  | -2.301691000 |
| H | -3.576963000 | 0.316197000  | -3.335596000 | C | 4.716627000  | 1.773646000  | -0.953594000 |
| B | 4.056037000  | -0.202085000 | 0.797288000  | C | 3.552500000  | 2.261153000  | 2.687912000  |
| N | 4.576391000  | -0.861830000 | 3.440865000  | H | 3.241701000  | 3.221451000  | 3.114509000  |
| C | 2.418510000  | -0.320313000 | 0.645822000  | H | 4.302306000  | 1.823894000  | 3.353366000  |
| C | 1.589902000  | -0.809076000 | 1.694477000  | H | 2.687492000  | 1.591638000  | 2.717018000  |
| H | 2.065233000  | -1.192457000 | 2.591983000  | C | 5.006597000  | 5.594056000  | -0.738217000 |
| C | 0.214659000  | -0.809463000 | 1.606693000  | H | 4.841899000  | 5.772115000  | -1.807178000 |
| H | -0.382053000 | -1.200568000 | 2.429178000  | H | 6.045777000  | 5.877977000  | -0.520829000 |
| C | -0.455722000 | -0.307017000 | 0.454344000  | H | 4.362363000  | 6.280581000  | -0.176800000 |

|   |             |              |              |   |             |              |             |
|---|-------------|--------------|--------------|---|-------------|--------------|-------------|
| C | 4.960734000 | 0.790570000  | -2.087493000 | H | 8.184429000 | -0.173314000 | 0.905973000 |
| H | 4.911499000 | 1.313402000  | -3.049955000 | H | 6.746104000 | 0.034863000  | 1.912952000 |
| H | 4.242214000 | -0.031298000 | -2.112626000 | H | 6.897858000 | 0.936318000  | 0.411561000 |
| H | 5.948044000 | 0.321618000  | -2.016230000 |   |             |              |             |
| C | 5.024407000 | -1.330825000 | 0.031243000  |   |             |              |             |
| C | 4.562809000 | -2.488466000 | -0.646289000 |   |             |              |             |
| C | 5.466648000 | -3.394494000 | -1.224268000 |   |             |              |             |
| H | 5.071074000 | -4.266431000 | -1.744115000 |   |             |              |             |
| C | 6.845395000 | -3.225228000 | -1.149485000 |   |             |              |             |
| C | 7.306061000 | -2.107563000 | -0.454292000 |   |             |              |             |
| H | 8.379838000 | -1.950510000 | -0.358638000 |   |             |              |             |
| C | 6.439839000 | -1.179515000 | 0.135706000  |   |             |              |             |
| C | 3.096930000 | -2.848682000 | -0.802077000 |   |             |              |             |
| H | 2.998165000 | -3.838533000 | -1.261435000 |   |             |              |             |
| H | 2.551005000 | -2.142279000 | -1.438477000 |   |             |              |             |
| H | 2.573681000 | -2.882444000 | 0.158682000  |   |             |              |             |
| C | 7.801943000 | -4.226086000 | -1.755039000 |   |             |              |             |
| H | 8.656446000 | -3.730232000 | -2.231123000 |   |             |              |             |
| H | 7.307454000 | -4.844772000 | -2.512313000 |   |             |              |             |
| H | 8.210183000 | -4.905873000 | -0.994297000 |   |             |              |             |
| C | 7.098441000 | -0.032554000 | 0.879492000  |   |             |              |             |
